# Supplementary material
Source: Springer Nature journal article supplement (https://www.springermedizin.de/resource/supplementary/12887_2009_335_MOESM3_ESM.pdf/9474864)

# Mortality

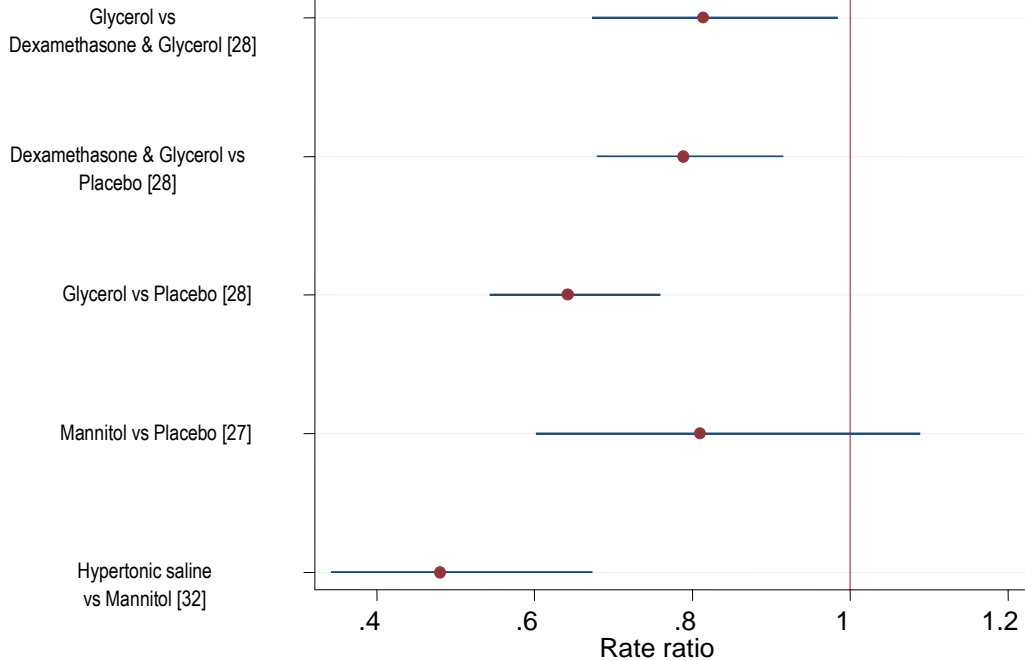

Supplement: MOESM3 [file 9474864]
